# Supplementary material for: Conformational Changes in Protein Loops and Helices Induced by Post-Translational Phosphorylation
Source: PLOS journal article supplement (doi:10.1371/journal.pcbi.0020032), 2006-04-17
Supplement: S1 (10.1371/journal.pcbi.0020032.s001) [file journal.pcbi.0020032.s001]

Conformational Changes in Protein Loops and Helices Induced by Post-Translational Phosphorylation

E. S. Groban, A. Narayanan, and M. P. Jacobson

**Supporting Information**

**Supplementary Table 1**: Partial atomic charges employed for pThr.

| Phosphorylated Threonine | | |
| --- | --- | --- |
| Atom ID | Charge in -2 state | Charge in -1 state |
| CB | 0.280 | 0.280 |
| HB | -0.030 | -0.030 |
| CG2 | -0.210 | -0.210 |
| 1HG2 | 0.060 | 0.060 |
| 2HG2 | 0.060 | 0.060 |
| 3HG2 | 0.060 | 0.060 |
| OG1 | -0.700 | -0.500 |
| P | 1.570 | 1.530 |
| O1P | -1.030 | -1.000 |
| O2P | -1.030 | -1.000 |
| O3P | -1.030 | -0.750 |
| HO | NA | 0.500 |
