# Supplementary material for: Conformational Changes in Protein Loops and Helices Induced by Post-Translational Phosphorylation
Source: PLOS journal article supplement (doi:10.1371/journal.pcbi.0020032), 2006-04-17
Supplement: S6 (10.1371/journal.pcbi.0020032.s006) [file journal.pcbi.0020032.s006]

Conformational Changes in Protein Loops and Helices Induced by Post-Translational Phosphorylation

E. S. Groban, A. Narayanan, and M. P. Jacobson

**Supporting Information**

**Supplementary Table 6**: Rotamer library used for sampling pSer. Numbers should be multiplied by 10 to obtain the torsion angle in degrees. The columns represent the sampled heavy-atom torsion angles, other than the rotation about the O-P bond in the phosphate group, which is sampled uniformly. 1 represents rotation about the C-C bond, and 2 is the rotation about the C-O bond.

-18 -18

-18 -17

-18 -16

-18 -15

-18 -14

-18 -13

-18 -12

-18 -11

-18 -10

-18 7

-18 8

-18 9

-18 10

-18 11

-18 12

-18 13

-18 14

-18 15

-18 16

-18 17

-18 18

-17 -18

-17 -17

-17 -16

-17 -15

-17 -14

-17 -13

-17 -12

-17 -11

-17 -10

-17 -9

-17 7

-17 8

-17 9

-17 10

-17 11

-17 12

-17 13

-17 14

-17 15

-17 16

-17 17

-17 18

-16 -18

-16 -17

-16 -16

-16 -15

-16 -14

-16 -13

-16 -12

-16 -11

-16 -10

-16 -9

-16 7

-16 8

-16 9

-16 10

-16 11

-16 12

-16 13

-16 14

-16 15

-16 16

-16 17

-16 18

-15 -18

-15 -17

-15 -16

-15 -15

-15 -14

-15 -13

-15 -12

-15 -11

-15 -10

-15 -9

-15 6

-15 7

-15 8

-15 9

-15 10

-15 11

-15 12

-15 13

-15 14

-15 15

-15 16

-15 17

-15 18

-14 -18

-14 -17

-14 -16

-14 -15

-14 -14

-14 -13

-14 -12

-14 -11

-14 -10

-14 -9

-14 6

-14 7

-14 8

-14 9

-14 10

-14 11

-14 12

-14 13

-14 14

-14 15

-14 16

-14 17

-14 18

-13 -18

-13 -17

-13 -16

-13 -15

-13 -14

-13 -13

-13 -12

-13 -11

-13 -10

-13 -9

-13 -8

-13 6

-13 7

-13 8

-13 9

-13 10

-13 11

-13 12

-13 13

-13 14

-13 15

-13 16

-13 18

-12 -18

-12 -17

-12 -16

-12 -15

-12 -14

-12 -13

-12 -12

-12 -11

-12 -10

-12 -9

-12 -8

-12 -7

-12 7

-12 8

-12 9

-12 10

-12 11

-12 12

-12 13

-12 14

-12 15

-12 16

-12 17

-12 18

-11 -18

-11 -17

-11 -16

-11 -14

-11 -13

-11 -12

-11 -11

-11 -10

-11 -9

-11 -8

-11 -7

-11 -6

-11 8

-11 9

-11 10

-11 11

-11 12

-11 13

-11 14

-11 15

-11 16

-11 17

-11 18

-10 -18

-10 -17

-10 -16

-10 -15

-10 -14

-10 -13

-10 -12

-10 -11

-10 -10

-10 -9

-10 -8

-10 -7

-10 -6

-10 8

-10 9

-10 10

-10 11

-10 12

-10 13

-10 15

-10 16

-10 17

-10 18

-9 -18

-9 -17

-9 -16

-9 -15

-9 -14

-9 -13

-9 -12

-9 -11

-9 -10

-9 -9

-9 -8

-9 -7

-9 -6

-9 8

-9 9

-9 10

-9 11

-9 12

-9 13

-9 14

-9 15

-9 16

-9 17

-9 18

-8 -18

-8 -17

-8 -16

-8 -15

-8 -14

-8 -13

-8 -12

-8 -11

-8 -10

-8 -9

-8 -8

-8 -7

-8 9

-8 10

-8 11

-8 12

-8 13

-8 14

-8 15

-8 17

-8 18

-7 -18

-7 -16

-7 -15

-7 -14

-7 -12

-7 -11

-7 -10

-7 -9

-7 -8

-7 -7

-7 9

-7 10

-7 11

-7 12

-7 13

-7 14

-7 16

-7 17

-7 18

-6 -18

-6 -17

-6 -16

-6 -15

-6 -14

-6 -13

-6 -12

-6 -11

-6 -10

-6 -9

-6 -8

-6 -7

-6 9

-6 10

-6 11

-6 12

-6 13

-6 14

-6 15

-6 16

-6 17

-6 18

-5 -18

-5 -17

-5 -16

-5 -15

-5 -14

-5 -13

-5 -12

-5 -11

-5 -10

-5 -9

-5 -8

-5 -7

-5 9

-5 10

-5 11

-5 12

-5 13

-5 14

-5 15

-5 16

-5 17

-5 18

-4 -18

-4 -17

-4 -16

-4 -15

-4 -13

-4 -12

-4 -11

-4 -10

-4 -9

-4 -8

-4 -7

-4 8

-4 9

-4 10

-4 11

-4 12

-4 13

-4 14

-4 15

-4 16

-4 17

-4 18

-3 -18

-3 -17

-3 -16

-3 -15

-3 -14

-3 -13

-3 -12

-3 -11

-3 -10

-3 -9

-3 -8

-3 -7

-3 8

-3 9

-3 10

-3 11

-3 12

-3 13

-3 14

-3 15

-3 16

-3 17

-3 18

-2 -18

-2 -17

-2 -16

-2 -15

-2 -14

-2 -13

-2 -12

-2 -10

-2 -9

-2 -8

-2 -7

-2 -6

-2 8

-2 9

-2 10

-2 11

-2 12

-2 13

-2 14

-2 15

-2 16

-2 17

-2 18

-1 -18

-1 -17

-1 -16

-1 -15

-1 -14

-1 -13

-1 -12

-1 -11

-1 -10

-1 -9

-1 -8

-1 -7

-1 8

-1 9

-1 10

-1 11

-1 12

-1 13

-1 14

-1 15

-1 16

-1 17

-1 18

0 -18

0 -17

0 -16

0 -15

0 -14

0 -13

0 -12

0 -11

0 -10

0 -9

0 -8

0 -7

0 7

0 8

0 9

0 10

0 11

0 12

0 13

0 14

0 15

0 16

0 17

0 18

1 -18

1 -17

1 -16

1 -15

1 -14

1 -13

1 -12

1 -11

1 -10

1 -9

1 -8

1 8

1 9

1 10

1 11

1 12

1 13

1 14

1 15

1 16

1 17

1 18

2 -18

2 -17

2 -16

2 -15

2 -14

2 -13

2 -12

2 -11

2 -10

2 -9

2 -8

2 8

2 9

2 10

2 11

2 12

2 13

2 14

2 15

2 16

2 17

2 18

3 -18

3 -17

3 -16

3 -15

3 -14

3 -13

3 -12

3 -11

3 -10

3 -9

3 -8

3 9

3 10

3 11

3 12

3 13

3 14

3 15

3 16

3 17

3 18

4 -18

4 -17

4 -16

4 -15

4 -14

4 -13

4 -12

4 -11

4 -10

4 -9

4 -8

4 9

4 10

4 11

4 12

4 13

4 14

4 15

4 16

4 17

4 18

5 -18

5 -17

5 -16

5 -15

5 -14

5 -13

5 -12

5 -10

5 -9

5 -8

5 9

5 10

5 11

5 12

5 13

5 14

5 15

5 16

5 17

5 18

6 -18

6 -17

6 -16

6 -15

6 -14

6 -13

6 -12

6 -11

6 -10

6 -9

6 9

6 10

6 11

6 12

6 13

6 14

6 15

6 16

6 17

6 18

7 -18

7 -17

7 -16

7 -15

7 -14

7 -13

7 -12

7 -11

7 -10

7 -9

7 9

7 10

7 11

7 12

7 13

7 14

7 15

7 16

7 17

7 18

8 -18

8 -17

8 -16

8 -15

8 -14

8 -13

8 -12

8 -11

8 -10

8 -9

8 9

8 10

8 11

8 12

8 14

8 15

8 16

8 17

8 18

9 -18

9 -17

9 -16

9 -15

9 -14

9 -13

9 -12

9 -11

9 -10

9 -9

9 -8

9 9

9 10

9 11

9 12

9 13

9 14

9 15

9 16

9 17

9 18

10 -18

10 -17

10 -16

10 -15

10 -14

10 -13

10 -12

10 -11

10 -10

10 -9

10 -8

10 9

10 10

10 11

10 12

10 13

10 14

10 15

10 16

10 18

11 -18

11 -17

11 -16

11 -15

11 -14

11 -13

11 -12

11 -11

11 -10

11 -9

11 -8

11 9

11 10

11 11

11 12

11 13

11 14

11 15

11 16

11 17

11 18

12 -18

12 -17

12 -16

12 -15

12 -14

12 -13

12 -12

12 -11

12 -10

12 -9

12 -8

12 8

12 9

12 10

12 11

12 12

12 13

12 14

12 15

12 16

12 17

12 18

13 -18

13 -17

13 -16

13 -15

13 -14

13 -13

13 -12

13 -11

13 -10

13 -9

13 8

13 9

13 10

13 11

13 12

13 13

13 14

13 15

13 16

13 17

13 18

14 -18

14 -17

14 -16

14 -15

14 -14

14 -13

14 -12

14 -11

14 -10

14 -9

14 7

14 8

14 9

14 10

14 12

14 13

14 14

14 15

14 16

14 17

14 18

15 -18

15 -17

15 -16

15 -15

15 -14

15 -13

15 -12

15 -11

15 -10

15 -9

15 8

15 9

15 10

15 11

15 12

15 13

15 14

15 15

15 16

15 17

15 18

16 -18

16 -17

16 -16

16 -15

16 -14

16 -13

16 -12

16 -11

16 -10

16 -9

16 7

16 8

16 9

16 10

16 12

16 13

16 14

16 15

16 16

16 17

16 18

17 -18

17 -17

17 -16

17 -15

17 -14

17 -13

17 -12

17 -11

17 -10

17 -9

17 7

17 8

17 9

17 10

17 11

17 12

17 14

17 15

17 16

17 17

17 18

18 -18

18 -17

18 -16

18 -15

18 -14

18 -13

18 -12

18 -11

18 -10

18 7

18 8

18 9

18 10

18 11

18 12

18 13

18 14

18 15

18 16

18 17

18 18
