# Supplementary material for: Conformational Changes in Protein Loops and Helices Induced by Post-Translational Phosphorylation
Source: PLOS journal article supplement (doi:10.1371/journal.pcbi.0020032), 2006-04-17
Supplement: S8 (10.1371/journal.pcbi.0020032.s008) [file journal.pcbi.0020032.s008]

Conformational Changes in Protein Loops and Helices Induced by Post-Translational Phosphorylation

E. S. Groban, A. Narayanan, and M. P. Jacobson

**Supporting Information**

**Supplementary Table 8**: Rotamer library used for sampling pAsp. Numbers should be multiplied by 30 to obtain the torsion angle in degrees. The columns represent the sampled heavy-atom torsion angles, other than the rotation about the O-P bond in the phosphate group, which is sampled uniformly. 1 represents rotation about the C-C bond, 2 is the rotation about C-C, and 3 is rotation about the C-O bond.

-5 -5 -5

-5 -5 -1

-5 -5 0

-5 -5 1

-5 -5 2

-5 -5 5

-5 -5 6

-5 -4 -5

-5 -4 -1

-5 -4 0

-5 -4 1

-5 -4 2

-5 -4 5

-5 -4 6

-5 -3 -5

-5 -3 -1

-5 -3 0

-5 -3 1

-5 -3 2

-5 -3 5

-5 -3 6

-5 -2 -5

-5 -2 -1

-5 -2 0

-5 -2 1

-5 -2 2

-5 -2 5

-5 -2 6

-5 -1 -5

-5 -1 -1

-5 -1 0

-5 -1 1

-5 -1 2

-5 -1 5

-5 -1 6

-5 0 -5

-5 0 -1

-5 0 0

-5 0 1

-5 0 2

-5 0 5

-5 0 6

-5 1 -5

-5 1 -1

-5 1 0

-5 1 1

-5 1 2

-5 1 5

-5 1 6

-5 2 -5

-5 2 -1

-5 2 0

-5 2 1

-5 2 2

-5 2 5

-5 2 6

-5 3 -5

-5 3 -1

-5 3 0

-5 3 1

-5 3 2

-5 3 5

-5 3 6

-5 4 -5

-5 4 -1

-5 4 0

-5 4 1

-5 4 2

-5 4 5

-5 4 6

-5 5 -5

-5 5 -1

-5 5 0

-5 5 1

-5 5 2

-5 5 5

-5 5 6

-5 6 -5

-5 6 -1

-5 6 0

-5 6 1

-5 6 2

-5 6 5

-5 6 6

-4 -5 -5

-4 -5 -1

-4 -5 0

-4 -5 1

-4 -5 2

-4 -5 5

-4 -5 6

-4 -4 -5

-4 -4 -1

-4 -4 0

-4 -4 1

-4 -4 2

-4 -4 5

-4 -4 6

-4 -3 -5

-4 -3 -1

-4 -3 0

-4 -3 1

-4 -3 2

-4 -3 5

-4 -3 6

-4 -2 -5

-4 -2 -1

-4 -2 0

-4 -2 1

-4 -2 2

-4 -2 5

-4 -2 6

-4 -1 -5

-4 -1 -1

-4 -1 0

-4 -1 1

-4 -1 2

-4 -1 5

-4 -1 6

-4 0 -5

-4 0 -1

-4 0 0

-4 0 1

-4 0 2

-4 0 5

-4 0 6

-4 1 -5

-4 1 -1

-4 1 0

-4 1 1

-4 1 2

-4 1 5

-4 1 6

-4 2 -5

-4 2 -1

-4 2 0

-4 2 1

-4 2 2

-4 2 5

-4 2 6

-4 3 -5

-4 3 -1

-4 3 0

-4 3 1

-4 3 2

-4 3 5

-4 3 6

-4 4 -5

-4 4 -1

-4 4 0

-4 4 1

-4 4 2

-4 4 5

-4 4 6

-4 5 -5

-4 5 -1

-4 5 0

-4 5 1

-4 5 2

-4 5 5

-4 5 6

-4 6 -5

-4 6 -1

-4 6 0

-4 6 1

-4 6 2

-4 6 5

-4 6 6

-3 -5 -5

-3 -5 -1

-3 -5 0

-3 -5 1

-3 -5 2

-3 -5 5

-3 -5 6

-3 -4 -5

-3 -4 -1

-3 -4 0

-3 -4 1

-3 -4 2

-3 -4 5

-3 -4 6

-3 -3 -5

-3 -3 -1

-3 -3 0

-3 -3 1

-3 -3 2

-3 -3 5

-3 -3 6

-3 -2 -5

-3 -2 -1

-3 -2 0

-3 -2 1

-3 -2 2

-3 -2 5

-3 -2 6

-3 -1 -5

-3 -1 -1

-3 -1 0

-3 -1 1

-3 -1 2

-3 -1 5

-3 -1 6

-3 0 -5

-3 0 -1

-3 0 0

-3 0 1

-3 0 2

-3 0 5

-3 0 6

-3 1 -5

-3 1 -1

-3 1 0

-3 1 1

-3 1 2

-3 1 5

-3 1 6

-3 2 -5

-3 2 -1

-3 2 0

-3 2 1

-3 2 2

-3 2 5

-3 2 6

-3 3 -5

-3 3 -1

-3 3 0

-3 3 1

-3 3 2

-3 3 5

-3 3 6

-3 4 -5

-3 4 -1

-3 4 0

-3 4 1

-3 4 2

-3 4 5

-3 4 6

-3 5 -5

-3 5 -1

-3 5 0

-3 5 1

-3 5 2

-3 5 5

-3 5 6

-3 6 -5

-3 6 -1

-3 6 0

-3 6 1

-3 6 2

-3 6 5

-3 6 6

-2 -5 -5

-2 -5 -1

-2 -5 0

-2 -5 1

-2 -5 2

-2 -5 5

-2 -5 6

-2 -4 -5

-2 -4 -1

-2 -4 0

-2 -4 1

-2 -4 2

-2 -4 5

-2 -4 6

-2 -3 -5

-2 -3 -1

-2 -3 0

-2 -3 1

-2 -3 2

-2 -3 5

-2 -3 6

-2 -2 -5

-2 -2 -1

-2 -2 0

-2 -2 1

-2 -2 2

-2 -2 5

-2 -2 6

-2 -1 -5

-2 -1 -1

-2 -1 0

-2 -1 1

-2 -1 2

-2 -1 5

-2 -1 6

-2 0 -5

-2 0 -1

-2 0 0

-2 0 1

-2 0 2

-2 0 5

-2 0 6

-2 1 -5

-2 1 -1

-2 1 0

-2 1 1

-2 1 2

-2 1 5

-2 1 6

-2 2 -5

-2 2 -1

-2 2 0

-2 2 1

-2 2 2

-2 2 5

-2 2 6

-2 3 -5

-2 3 -1

-2 3 0

-2 3 1

-2 3 2

-2 3 5

-2 3 6

-2 4 -5

-2 4 -1

-2 4 0

-2 4 1

-2 4 2

-2 4 5

-2 4 6

-2 5 -5

-2 5 -1

-2 5 0

-2 5 1

-2 5 2

-2 5 5

-2 5 6

-2 6 -5

-2 6 -1

-2 6 0

-2 6 1

-2 6 2

-2 6 5

-2 6 6

-1 -5 -5

-1 -5 -1

-1 -5 0

-1 -5 1

-1 -5 2

-1 -5 5

-1 -5 6

-1 -4 -5

-1 -4 -1

-1 -4 0

-1 -4 1

-1 -4 2

-1 -4 5

-1 -4 6

-1 -3 -5

-1 -3 -1

-1 -3 0

-1 -3 1

-1 -3 2

-1 -3 5

-1 -3 6

-1 -2 -5

-1 -2 -1

-1 -2 0

-1 -2 1

-1 -2 2

-1 -2 5

-1 -2 6

-1 -1 -5

-1 -1 -1

-1 -1 0

-1 -1 1

-1 -1 2

-1 -1 5

-1 -1 6

-1 0 -5

-1 0 -1

-1 0 0

-1 0 1

-1 0 2

-1 0 5

-1 0 6

-1 1 -5

-1 1 -1

-1 1 0

-1 1 1

-1 1 2

-1 1 5

-1 1 6

-1 2 -5

-1 2 -1

-1 2 0

-1 2 1

-1 2 2

-1 2 5

-1 2 6

-1 3 -5

-1 3 -1

-1 3 0

-1 3 1

-1 3 2

-1 3 5

-1 3 6

-1 4 -5

-1 4 -1

-1 4 0

-1 4 1

-1 4 2

-1 4 5

-1 4 6

-1 5 -5

-1 5 -1

-1 5 0

-1 5 1

-1 5 2

-1 5 5

-1 5 6

-1 6 -5

-1 6 -1

-1 6 0

-1 6 1

-1 6 2

-1 6 5

-1 6 6

0 -5 -5

0 -5 -1

0 -5 0

0 -5 1

0 -5 2

0 -5 5

0 -5 6

0 -4 -5

0 -4 -1

0 -4 0

0 -4 1

0 -4 2

0 -4 5

0 -4 6

0 -3 -5

0 -3 -1

0 -3 0

0 -3 1

0 -3 2

0 -3 5

0 -3 6

0 -2 -5

0 -2 -1

0 -2 0

0 -2 1

0 -2 2

0 -2 5

0 -2 6

0 -1 -5

0 -1 -1

0 -1 0

0 -1 1

0 -1 2

0 -1 5

0 -1 6

0 0 -5

0 0 -1

0 0 0

0 0 1

0 0 2

0 0 5

0 0 6

0 1 -5

0 1 -1

0 1 0

0 1 1

0 1 2

0 1 5

0 1 6

0 2 -5

0 2 -1

0 2 0

0 2 1

0 2 2

0 2 5

0 2 6

0 3 -5

0 3 -1

0 3 0

0 3 1

0 3 2

0 3 5

0 3 6

0 4 -5

0 4 -1

0 4 0

0 4 1

0 4 2

0 4 5

0 4 6

0 5 -5

0 5 -1

0 5 0

0 5 1

0 5 2

0 5 5

0 5 6

0 6 -5

0 6 -1

0 6 0

0 6 1

0 6 2

0 6 5

0 6 6

1 -5 -5

1 -5 -1

1 -5 0

1 -5 1

1 -5 2

1 -5 5

1 -5 6

1 -4 -5

1 -4 -1

1 -4 0

1 -4 1

1 -4 2

1 -4 5

1 -4 6

1 -3 -5

1 -3 -1

1 -3 0

1 -3 1

1 -3 2

1 -3 5

1 -3 6

1 -2 -5

1 -2 -1

1 -2 0

1 -2 1

1 -2 2

1 -2 5

1 -2 6

1 -1 -5

1 -1 -1

1 -1 0

1 -1 1

1 -1 2

1 -1 5

1 -1 6

1 0 -5

1 0 -1

1 0 0

1 0 1

1 0 2

1 0 5

1 0 6

1 1 -5

1 1 -1

1 1 0

1 1 1

1 1 2

1 1 5

1 1 6

1 2 -5

1 2 -1

1 2 0

1 2 1

1 2 2

1 2 5

1 2 6

1 3 -5

1 3 -1

1 3 0

1 3 1

1 3 2

1 3 5

1 3 6

1 4 -5

1 4 -1

1 4 0

1 4 1

1 4 2

1 4 5

1 4 6

1 5 -5

1 5 -1

1 5 0

1 5 1

1 5 2

1 5 5

1 5 6

1 6 -5

1 6 -1

1 6 0

1 6 1

1 6 2

1 6 5

1 6 6

2 -5 -5

2 -5 -1

2 -5 0

2 -5 1

2 -5 2

2 -5 5

2 -5 6

2 -4 -5

2 -4 -1

2 -4 0

2 -4 1

2 -4 2

2 -4 5

2 -4 6

2 -3 -5

2 -3 -1

2 -3 0

2 -3 1

2 -3 2

2 -3 5

2 -3 6

2 -2 -5

2 -2 -1

2 -2 0

2 -2 1

2 -2 2

2 -2 5

2 -2 6

2 -1 -5

2 -1 -1

2 -1 0

2 -1 1

2 -1 2

2 -1 5

2 -1 6

2 0 -5

2 0 -1

2 0 0

2 0 1

2 0 2

2 0 5

2 0 6

2 1 -5

2 1 -1

2 1 0

2 1 1

2 1 2

2 1 5

2 1 6

2 2 -5

2 2 -1

2 2 0

2 2 1

2 2 2

2 2 5

2 2 6

2 3 -5

2 3 -1

2 3 0

2 3 1

2 3 2

2 3 5

2 3 6

2 4 -5

2 4 -1

2 4 0

2 4 1

2 4 2

2 4 5

2 4 6

2 5 -5

2 5 -1

2 5 0

2 5 1

2 5 2

2 5 5

2 5 6

2 6 -5

2 6 -1

2 6 0

2 6 1

2 6 2

2 6 5

2 6 6

3 -5 -5

3 -5 -1

3 -5 0

3 -5 1

3 -5 2

3 -5 5

3 -5 6

3 -4 -5

3 -4 -1

3 -4 0

3 -4 1

3 -4 2

3 -4 5

3 -4 6

3 -3 -5

3 -3 -1

3 -3 0

3 -3 1

3 -3 2

3 -3 5

3 -3 6

3 -2 -5

3 -2 -1

3 -2 0

3 -2 1

3 -2 2

3 -2 5

3 -2 6

3 -1 -5

3 -1 -1

3 -1 0

3 -1 1

3 -1 2

3 -1 5

3 -1 6

3 0 -5

3 0 -1

3 0 0

3 0 1

3 0 2

3 0 5

3 0 6

3 1 -5

3 1 -1

3 1 0

3 1 1

3 1 2

3 1 5

3 1 6

3 2 -5

3 2 -1

3 2 0

3 2 1

3 2 2

3 2 5

3 2 6

3 3 -5

3 3 -1

3 3 0

3 3 1

3 3 2

3 3 5

3 3 6

3 4 -5

3 4 -1

3 4 0

3 4 1

3 4 2

3 4 5

3 4 6

3 5 -5

3 5 -1

3 5 0

3 5 1

3 5 2

3 5 5

3 5 6

3 6 -5

3 6 -1

3 6 0

3 6 1

3 6 2

3 6 5

3 6 6

4 -5 -5

4 -5 -1

4 -5 0

4 -5 1

4 -5 2

4 -5 5

4 -5 6

4 -4 -5

4 -4 -1

4 -4 0

4 -4 1

4 -4 2

4 -4 5

4 -4 6

4 -3 -5

4 -3 -1

4 -3 0

4 -3 1

4 -3 2

4 -3 5

4 -3 6

4 -2 -5

4 -2 -1

4 -2 0

4 -2 1

4 -2 2

4 -2 5

4 -2 6

4 -1 -5

4 -1 -1

4 -1 0

4 -1 1

4 -1 2

4 -1 5

4 -1 6

4 0 -5

4 0 -1

4 0 0

4 0 1

4 0 2

4 0 5

4 0 6

4 1 -5

4 1 -1

4 1 0

4 1 1

4 1 2

4 1 5

4 1 6

4 2 -5

4 2 -1

4 2 0

4 2 1

4 2 2

4 2 5

4 2 6

4 3 -5

4 3 -1

4 3 0

4 3 1

4 3 2

4 3 5

4 3 6

4 4 -5

4 4 -1

4 4 0

4 4 1

4 4 2

4 4 5

4 4 6

4 5 -5

4 5 -1

4 5 0

4 5 1

4 5 2

4 5 5

4 5 6

4 6 -5

4 6 -1

4 6 0

4 6 1

4 6 2

4 6 5

4 6 6

5 -5 -5

5 -5 -1

5 -5 0

5 -5 1

5 -5 2

5 -5 5

5 -5 6

5 -4 -5

5 -4 -1

5 -4 0

5 -4 1

5 -4 2

5 -4 5

5 -4 6

5 -3 -5

5 -3 -1

5 -3 0

5 -3 1

5 -3 2

5 -3 5

5 -3 6

5 -2 -5

5 -2 -1

5 -2 0

5 -2 1

5 -2 2

5 -2 5

5 -2 6

5 -1 -5

5 -1 -1

5 -1 0

5 -1 1

5 -1 2

5 -1 5

5 -1 6

5 0 -5

5 0 -1

5 0 0

5 0 1

5 0 2

5 0 5

5 0 6

5 1 -5

5 1 -1

5 1 0

5 1 1

5 1 2

5 1 5

5 1 6

5 2 -5

5 2 -1

5 2 0

5 2 1

5 2 2

5 2 5

5 2 6

5 3 -5

5 3 -1

5 3 0

5 3 1

5 3 2

5 3 5

5 3 6

5 4 -5

5 4 -1

5 4 0

5 4 1

5 4 2

5 4 5

5 4 6

5 5 -5

5 5 -1

5 5 0

5 5 1

5 5 2

5 5 5

5 5 6

5 6 -5

5 6 -1

5 6 0

5 6 1

5 6 2

5 6 5

5 6 6

6 -5 -5

6 -5 -1

6 -5 0

6 -5 1

6 -5 2

6 -5 5

6 -5 6

6 -4 -5

6 -4 -1

6 -4 0

6 -4 1

6 -4 2

6 -4 5

6 -4 6

6 -3 -5

6 -3 -1

6 -3 0

6 -3 1

6 -3 2

6 -3 5

6 -3 6

6 -2 -5

6 -2 -1

6 -2 0

6 -2 1

6 -2 2

6 -2 5

6 -2 6

6 -1 -5

6 -1 -1

6 -1 0

6 -1 1

6 -1 2

6 -1 5

6 -1 6

6 0 -5

6 0 -1

6 0 0

6 0 1

6 0 2

6 0 5

6 0 6

6 1 -5

6 1 -1

6 1 0

6 1 1

6 1 2

6 1 5

6 1 6

6 2 -5

6 2 -1

6 2 0

6 2 1

6 2 2

6 2 5

6 2 6

6 3 -5

6 3 -1

6 3 0

6 3 1

6 3 2

6 3 5

6 3 6

6 4 -5

6 4 -1

6 4 0

6 4 1

6 4 2

6 4 5

6 4 6

6 5 -5

6 5 -1

6 5 0

6 5 1

6 5 2

6 5 5

6 5 6

6 6 -5

6 6 -1

6 6 0

6 6 1

6 6 2

6 6 5

6 6 6
